# Supplementary material for: Characterization of the circRNA Landscape in Interleukin-4 Induced Anti-Inflammatory Microglia
Source: MDPI journal article supplement (doi:10.3390/biomedicines11123239), 2023-12-07
Supplement: s1 [file s1]

## Supplementary Materials

### The statistics of the circRNA-seq mapping

#### 1. rRNA reads filtering

In the process of library construction, there will be a small amount of ribosomal RNA (rRNA) fragments remaining, resulting in the existence of some rRNA reads in the data. To avoid affecting the subsequent analysis of the data, we remove the known rRNA sequences by comparing them with the rRNA sequences in the RNACentral database, and obtain the data with the rRNA reads removed for the subsequent analysis. The statistics are shown in the table below, and the effective\_reads will be used in the next step of genome alignment.

| Type                | Ctrl-1                  | Ctrl-2                  | Ctrl-3                  | IL4-1                   | IL4-2                   | IL4-3                   |
|---------------------|-------------------------|-------------------------|-------------------------|-------------------------|-------------------------|-------------------------|
| Clean_reads         | 146,071,972<br>(100%)   | 118,941,766<br>(100%)   | 158,856,688<br>(100%)   | 126,193,342<br>(100%)   | 136,237,890<br>(100%)   | 149,802,546<br>(100%)   |
| rRNA_reads          | 10,285,600<br>(7.04%)   | 8,855,422<br>(7.45%)    | 9,414,366<br>(5.93%)    | 17,221,910<br>(13.65%)  | 15,028,334<br>(11.03%)  | 11,212,610<br>(7.48%)   |
| The_effective_reads | 135,786,372<br>(92.96%) | 110,086,344<br>(92.55%) | 149,442,322<br>(94.07%) | 108,971,432<br>(86.35%) | 121,209,556<br>(88.97%) | 138,589,936<br>(92.52%) |

Note:

<sup>1</sup> Clean\_reads: number of reads in Clean Data after quality control and percentage of Clean\_reads;

<sup>2</sup> rRNA\_reads: number of rRNA reads and percentage of Clean\_reads;

<sup>3</sup> The\_effective\_reads: number of effective reads for circRNA analysis and percentage of Clean\_reads.

#### 2. Genome alignment

We used both CIRI2 and CIRCexplorer2 algorithms for circRNA identification. Reads were mapped to human reference genome GRCh37/hg19 by BWA-MEM or TopHat, respectively. Since the results of CIRI2 algorithm were preferred for the subsequent calculation of circRNA expression, the results of genome alignment for CIRI2 are listed in the table below.

| Sample | Total Reads | Mapped Reads | Mapped Reads% |
|--------|-------------|--------------|---------------|
| Ctrl-2 | 110,086,344 | 109,794,762  | 99.74%        |
| Ctrl-1 | 135,786,372 | 135,390,490  | 99.71%        |
| Ctrl-3 | 149,442,322 | 149,093,721  | 99.77%        |
| IL4-1  | 108,971,432 | 108,485,871  | 99.55%        |
| IL4-2  | 121,209,556 | 120,845,719  | 99.70%        |
| IL4-3  | 138,589,936 | 138,234,069  | 99.74%        |

### 3. CircRNA identification

We used CIRI2 for circRNA identification. CIRI2 uses the result file of BWA-MEM alignment to the genome as the input file, and predicts the position information before and after the formation of circRNA for each sample individually, and further identifies the candidate circRNA sequences. The results of each sample are shown in the table below.

| Sample | CIRI2 circRNAs | CIRCexplorer2 circRNAs | Overlapped circRNAs |
|--------|----------------|------------------------|---------------------|
| Ctrl-1 | 8,664          | 8,635                  | 4,856               |
| Ctrl-2 | 7,192          | 7,496                  | 4,159               |
| Ctrl-3 | 8,289          | 9,516                  | 5,030               |
| IL4-1  | 5,564          | 5,529                  | 3,036               |
| IL4-2  | 7,848          | 8,702                  | 4,764               |
| IL4-3  | 7,359          | 7,720                  | 4,195               |

## Supplementary Tables

**Supplementary Table S1. Sequences of divergent primers for circRNA detection**

| Name                  | Divergent Primer_F      | Divergent Primer_R      |
|-----------------------|-------------------------|-------------------------|
| mmu_circUbe3a         | TCACCCTGATGTCACCGAAT    | GCTGCTAACTTGATCTGAACGT  |
| mmu_circFocad         | TGCAAGCACTGAGAGAAGGA    | CCGTCTGGTTTGTGGATTGG    |
| mmu_circDennd1b       | AGTAAGCAGCGATTTGGGTTC   | AGGTAAAGTGCTGTCCAACCTTG |
| mmu_circNfatc2        | CATTCCCATCTGCAGCATCC    | GGCTGGTTCGAGGTGACATT    |
| mmu_circFbxw11        | CAGGTGGAATTTGTGGAGCA    | GCACTTTTCTTTGGGGACTCA   |
| mmu_circUbe2g1        | AAAGATTATCCCCTCCGGCC    | AACCTGCTGAAAAGCCTTCC    |
| mmu_circAnkib1        | ATGAAGGACTAAGGCCCCAG    | AGTGCTTTGCGGAATTTGGT    |
| mmu_circCtu2          | TGCCCATGGTCATCTTCAGT    | AGCACGAATGTACTTGGGGA    |
| mmu_circTmbim6        | ATGTATGTTTGTGGCGGCAG    | TGTCGAGGGAGTTATGTGGG    |
| mmu_circMtf2          | ACAGAGCTGCTTCATCATATTTG | AGCCATCTGACCATCTAGCT    |
| mmu_circGtf3c6        | GAACGAGGGAATTGACACGG    | ACATAGCTGTCCACTTGCATG   |
| mmu_circLarge         | ATTCTGGCTGCCTCTTTGA     | CCCAGCATCCTCTCAGAAGT    |
| mmu_circAcer3         | CAGGTCATGTATGGAATGTTGGT | AGCTCTTTGTCTTGAAACACTCA |
| mmu_circDicer1        | TGCTGTGAGTTTCCAATGAGC   | GCTCTCGAAATGCTGACTCT    |
| mmu_circ9130011E15Rik | GCACCAGAGCTTTGACAACC    | TGTTGTGCTTGGCCAAAAGT    |
| mmu_circMgat4a        | TCCTGAAGAGAAGCTGGACTG   | GCGGAAGTGTGGACAATG      |
| mmu_circPsmc14        | GACTTCTTAGACTTGGAGGAGGT | TCCAAGTCTTGCTAATTCTGGC  |
| mmu_circLrmp          | TCTGGTGACCTTGACTGCAA    | TGCTCTCCGAGGATGAAGTC    |
| mmu_circN4bp1         | ACCAGGACGAGCAGATTTGA    | GAGGTCAGCACACGTATCCT    |
| mmu_circSmad4         | GGACTGCACCATACACACCT    | AAGACATCTGGTGAGCAGGA    |
| mmu_circDlg3          | ACCTGAGGAATGCTACCCAC    | CTGCGATACTGAAGCCAAGG    |
| mmu_circTmtc4         | TCAGTACTGTTTGGTGGCCT    | AGGACTTGTGGCTGGTGTTA    |
| mmu_circCd47          | GGCCTTCAACACTGACCAAG    | CATTACGGACGATGCAAGGG    |
| mmu_circMlt10         | AACATGTGCTCAGTTTGCCG    | TCAGGGTTAGGCAAAGTGTC    |
| mmu_circDgke          | CCACTGTGCTCAAATCCAGG    | AGCGTGAAAATTGAGAGCCA    |
| mmu_circRasa2         | GCAGTTACAGCAGGAAGTCC    | CAATCGCGCATTTTGTGTTGGG  |
| mmu_circFam20c        | AGTGGCTGGTAGGATGATCA    | TGGAAGGCAGCGATCTCC      |
| mmu_circCdk13         | ACGGGAGAAATGGTAGCCTT    | CTTCGGGATTGGCAGATCG     |
| mmu_circEpb41l2       | GATGGCACGGAATACAGCTG    | ACCCTTTTCTTCCTCTGGCT    |
| mmu_circSlc17a5       | AGCCGCTGACTATTTAAGGGT   | CCACCTTCTGCGAAGAAAGC    |
| mmu_circMat2b         | GGGCTGCTGTGTTGAGAATT    | CACCAGTAATGAGAACCCGC    |
| mmu_circCse1l         | GCCTCCTGAATCAGTTGACC    | AACCTTGGTGATCGTTTGCC    |
| mmu_circApp           | GACACACATGGCCAGAGTTG    | TTGGCTTTCTGGAAATGGGC    |
| mmu_circRad50         | GCCGTGATGAAATGCTTGGG    | CTCGCTGCTTTGAGGACTTT    |
| mmu_circKlc1          | AAAACCCTGGGCAGAGATCA    | TTCTCGGACTCCACAGCATT    |
| mmu_circKif23         | TCGGATGATCGTGTGTGTGA    | GTTGGTTCTTTCGCTCCAG     |
| mmu_circCacna1b       | TCCCCAACAGCACAGATACA    | CCTCGAAGCAAAAGATCCCG    |
| mmu_circPtk2          | GTGCCAGATGTGAGAGCTCT    | AACTCAGAAGGCAGCAGTGA    |

|                |                       |                        |
|----------------|-----------------------|------------------------|
| mmu_circAdgre1 | TGCGCAGATGTTGATGAGTG  | TGGACAGGAAGCCTCGTTTA   |
| mmu_circUtp6   | TCCAGGTGCTCATTGACTCA  | TCCATTTCCCATTGGCTGC    |
| mmu_circDcaf6  | AATCAACTGTAGGCGTGCTG  | CACAGCCATCATGCACATTTAA |
| mmu_circAsl    | GCAGAAGCGGATCAATGTCT  | GTCCTGTGTGTAGCTTCCCT   |
| mmu_circNrp2   | GGGGAAAAGTGCAGCTTTGA  | GTGGCATGTGGAGCTTGTTT   |
| mmu_circRai14  | TCTCTCGGACACAATGCCTT  | ATCTTGGGCAGTCACATCCA   |
| mmu_circHira   | CAGCACTGTGTTTGGTTCCA  | AGAATCCTGCCCTTGTCCCTC  |
| mmu_circFubp3  | CGAACGGGTGTGAAAATGGT  | AAGGCCCTAACTGGTTACC    |
| mmu_circGsap   | AGGATTTTGGATGCTGCTAG  | TGCAGGTGTCTCAGTAGGTG   |
| mmu_circUsp3   | AGGAAGGCGAACATACCACA  | ACCACAAAATCGTCACAGCG   |
| mmu_circTaspl  | CAGGCTGCTCTTTATGGATGT | AGTGCCTGAGTCATTTTCCTG  |

**Supplementary Table S2. The list of miRNAs predicted to bind with circAdgre1**

|               |             |              |
|---------------|-------------|--------------|
| miR-125a-3p   | miR-1969    | miR-6993-5p  |
| miR-140-3p    | miR-664-3p  | miR-7004-3p  |
| miR-145a-5p   | miR-3057-5p | miR-7008-5p  |
| miR-152-3p    | miR-3057-3p | miR-7012-5p  |
| miR-153-5p    | miR-3077-5p | miR-7037-5p  |
| miR-181a-5p   | miR-3078-5p | miR-7044-5p  |
| miR-182-5p    | miR-3082-5p | miR-7056-5p  |
| miR-188-3p    | miR-3087-5p | miR-7063-5p  |
| miR-191-3p    | miR-3092-3p | miR-7074-5p  |
| miR-194-1-3p  | miR-3097-5p | miR-7080-5p  |
| miR-143-5p    | miR-3962    | miR-7086-5p  |
| miR-96-5p     | miR-5107-5p | miR-7087-5p  |
| miR-326-5p    | miR-5108    | miR-7088-5p  |
| miR-320-3p    | miR-1231-5p | miR-7222-5p  |
| miR-181b-5p   | miR-5626-3p | miR-7230-3p  |
| miR-380-5p    | miR-6347    | miR-7234-3p  |
| miR-468-3p    | miR-145b    | miR-7242-3p  |
| miR-758-5p    | miR-6396    | miR-7651-5p  |
| miR-671-5p    | miR-6402    | miR-7662-3p  |
| miR-1298-5p   | miR-3473e   | miR-7668-3p  |
| miR-344d-2-5p | miR-6905-5p | miR-7669-3p  |
| miR-681       | miR-6915-3p | miR-7677-3p  |
| miR-505-5p    | miR-6917-5p | miR-6715-5p  |
| miR-181d-5p   | miR-6925-5p | miR-7688-5p  |
| miR-574-3p    | miR-6926-5p | miR-1291     |
| miR-873a-3p   | miR-6932-5p | miR-8100     |
| miR-1197-5p   | miR-6937-5p | miR-497b     |
| miR-1902      | miR-6938-5p | miR-3154     |
| miR-1894-5p   | miR-6947-5p | miR-9b-3p    |
| miR-1930-3p   | miR-6957-5p | miR-12188-5p |
| miR-1953      | miR-6958-5p | miR-12196-3p |
| miR-1955-5p   | miR-6958-3p |              |

Supplementary Figures

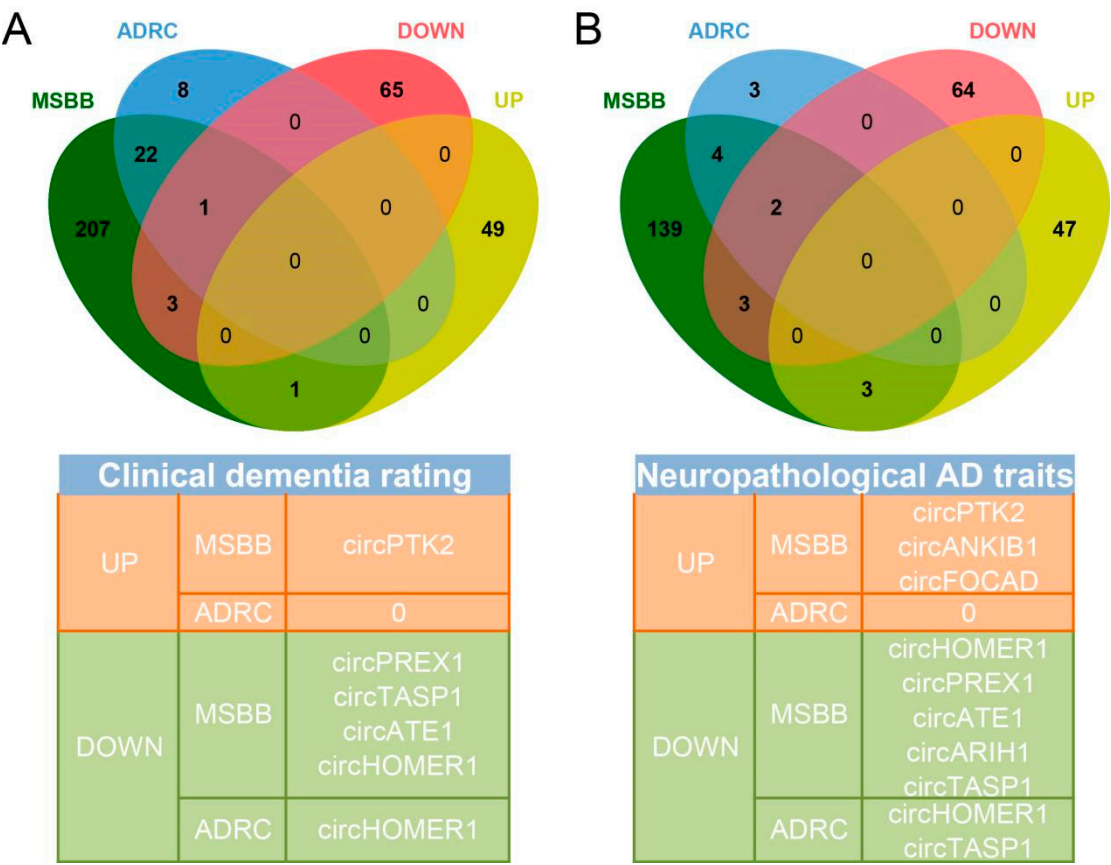

**Supplementary Figure S1 The comparison of differentially expressed circRNAs in different studies**

The differentially expressed circRNAs in this study were compared to those in the study by *Dube et al. 2019*. (A) For clinical dementia rating, we found 3 shared circRNAs in "MSBB" and "DOWN": circPREX1, circTASP1, circATE1; 1 shared circRNA in "ADRC", "MSBB" and "DOWN": circHOMER1; 1 shared circRNA in "MSBB" and "UP": circPTK2. (B) For neuropathological AD traits, we found 2 shared circRNAs in "MSBB" and "UP": circPTK2, circANKIB1; 3 shared circRNAs in "MSBB" and "DOWN": circHOMER1, circPREX1, circATE1.

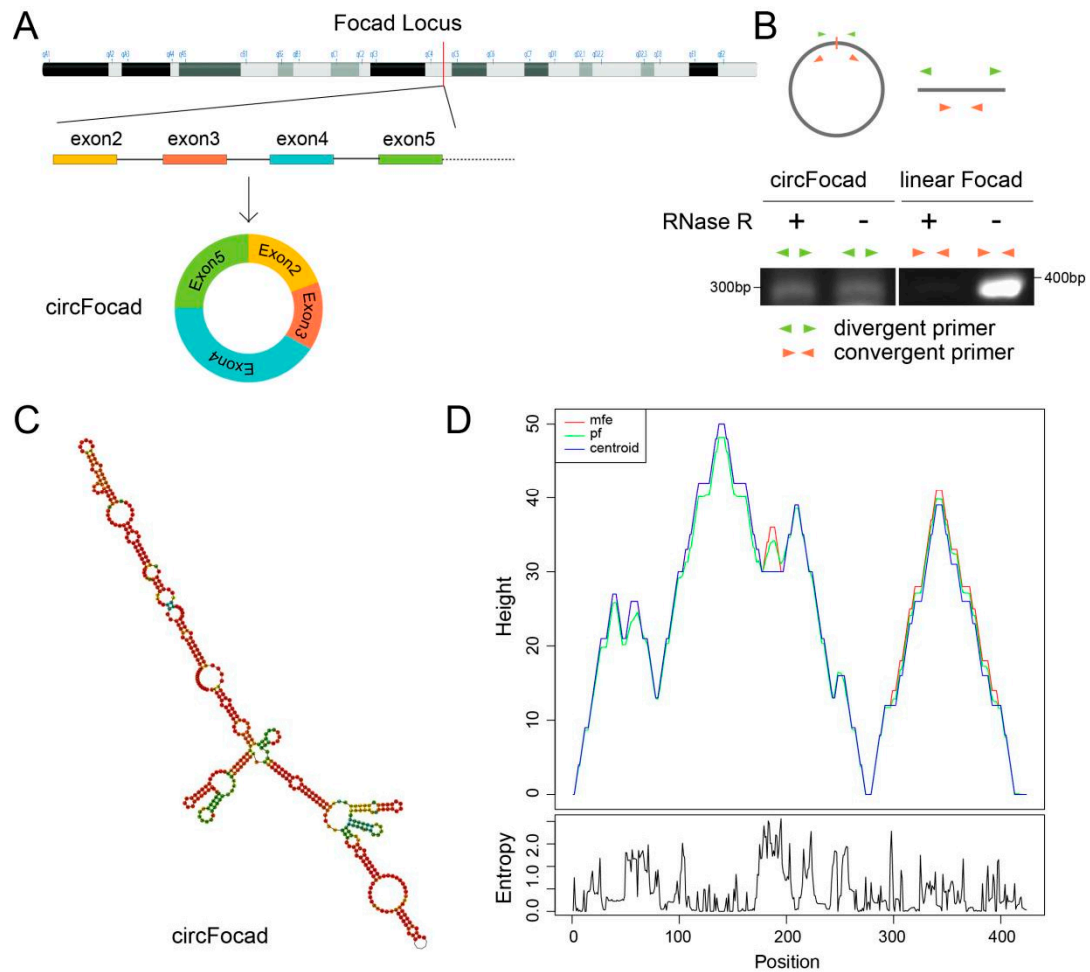

### Supplementary Figure S2 Characterization of the circFocad identity

(A) The formation of circFocad by back splicing from the host gene. (B) Schematic diagram of nucleic acid electrophoresis and circular formation of total RNA with RNase R treatment. (C, D) The secondary structure of circFocad was predicted by RNAfold web server and displayed as mountain plot.
